# Supplementary material for: Genomic and transcriptional analysis of genes containing fibrinogen and IgSF domains in the schistosome vector Biomphalaria glabrata, with emphasis on the differential responses of snails susceptible or resistant to Schistosoma mansoni
Source: PLoS Negl Trop Dis. 2020 Oct 14;14(10):e0008780. doi: 10.1371/journal.pntd.0008780 (PMC7588048; doi:10.1371/journal.pntd.0008780)
Supplement: S5 Table — Normalized average read counts for each group in RES and SUS with or without exposure to S. mansoni Notes: 1. Values in cells represent the average normalized read counts for each group at different sampling time points. 2. “0.5dpe, 2dpe, 8dpe, 40dpe” represent the 4 sampling time points. They include time-matched unexposed controls and exposed snails for valid comparisons. 3. In the column of “Type of FReD”, B. glabrata FReD proteins were considered “partial” based on the criteria set in this study. “1-IgSF FREP” and “2-IgSF FREP” represent numbers of IgSF domains in a particular FREP. 4. In the column of “ID used in text”, IDs highlighted in gray represent the differentially expressed (DE) FReD genes in any comparison applied. 5. In the column of “Best hit to published FREP”, the best hit of the protein against published B. glabrata FREP sequences from available sources [30,32–34] were listed. Any protein sequence identity ≥90% is considered as the same FREP; identity 85~90% is considered as the corresponding FREP “-like”; identity <85% is not assigned to any published FREP. Several FREPs were highlighted in yellow to emphasize in this study. 6. In the differential expression analysis, SUS unexposed snails were set as baseline for the corresponding time-matched RES unexposed snails at constitutive level; RES unexposed snails were used as baseline for the corresponding time-matched RES snails exposed to S. mansoni; similarly, SUS unexposed snails were used as baseline for the corresponding time-matched SUS snails exposed to S. mansoni. (XLSX) [file pntd.0008780.s005.xlsx]

## Sheet: S5 Table
S5 Table. Normalized average read counts for each group in RES and SUS with or without exposure to S. mansoni
ID used in text	Unexposed RES vs. Unexposed SUS						RES-exposed to S. mansoni								SUS-exposed to S. mansoni								Type of FReD	Best hit to known FREP	VB Gene ID
	0.5dpe		2dpe		40dpe		0.5dpe		2dpe		8dpe		40dpe		0.5dpe		2dpe		8dpe		40dpe
	RES unexposed	SUS unexposed	RES unexposed	SUS unexposed	RES unexposed	SUS unexposed	RES exposed	RES unexposed	RES exposed	RES unexposed	RES exposed	RES unexposed	RES exposed	RES unexposed	SUS exposed	SUS unexposed	SUS exposed	SUS unexposed	SUS exposed	SUS unexposed	SUS exposed	SUS unexposed
Bg11	111.6	56	47.8	50.8	72.4	70.2	280.4	111.6	164.2	47.8	96.8	47.8	98.6	72.4	51.5	56	47.1	50.8	47.8	50.8	74.8	70.2	1-IgSF FREP	11_sig_1434_BGLB000011	BGLB000011
Bg19	276.2	328.9	84.8	215.1	182.3	828.5	406.2	276.2	208.3	84.8	150	84.8	351.2	182.3	311	328.9	213.3	215.1	347.3	215.1	795.1	828.5	2-IgSF FREP	FREP5	BGLB000019
Bg74	395	132.3	236.5	81.5	192.1	79.8	780.4	395	551.5	236.5	326.6	236.5	279.9	192.1	63.1	132.3	57.8	81.5	89.4	81.5	64.3	79.8	partial 2-IgSF FREP	FREPJ4	BGLB000074
Bg96	228.2	102.7	149.5	70.4	182.9	280.7	242.6	228.2	540.5	149.5	320.2	149.5	173.1	182.9	105.1	102.7	91.1	70.4	68.7	70.4	123.2	280.7	2-IgSF FREP	FREP3.1	BGLB000096
Bg116	70.2	327.7	22	94.6	28	224.9	275.5	70.2	277.2	22	73.1	22	60.7	28	171	327.7	97.5	94.6	175.1	94.6	290.6	224.9	2-IgSF FREP	1_tig_99_BGLB000116	BGLB000116
Bg131	124.1	239.3	50.3	165.7	69.4	408	177.3	124.1	111.2	50.3	84.5	50.3	126.7	69.4	231.9	239.3	177.3	165.7	312.7	165.7	510.2	408	partial 2-IgSF FREP	z_tig_6870_frameshifts	BGLB000131
Bg133	781.6	222.5	329	173.8	300.4	526.2	1300.4	781.6	818.6	329	553.7	329	690.3	300.4	184.2	222.5	154.5	173.8	393.3	173.8	499.8	526.2	2-IgSF FREP	22_tig_4104_BGLB000133	BGLB000133
Bg141	1293.2	762.3	3366.3	1231.8	236.3	23.2	1319.2	1293.2	2693.1	3366.3	1371.7	3366.3	447.7	236.3	702.1	762.3	1068.1	1231.8	462.9	1231.8	133.7	23.2	1-IgSF FREP	FREPA	BGLB000141
Bg152	408.9	2087.7	10.7	11.1	6.8	72.9	3201.7	408.9	6342.8	10.7	294.5	10.7	76.8	6.8	43.3	2087.7	33.2	11.1	42.8	11.1	236.6	72.9	1-IgSF FREP	FREP4	BGLB000152
Bg204	535.6	2261	334.2	1965.3	389.3	3500.3	2072.2	535.6	2819.7	334.2	709.1	334.2	490.6	389.3	2166.1	2261	2345.4	1965.3	2298.5	1965.3	3402.4	3500.3	2-IgSF FREP	FREP3.2	BGLB000204
Bg4529	45.1	89.5	18.1	37.5	29.9	21.5	81.2	45.1	38.2	18.1	30.7	18.1	50.1	29.9	53.6	89.5	30.2	37.5	26	37.5	42.6	21.5	2-IgSF FREP	FREP7-like	BGLB004529
Bg4530	221.6	586	57.9	397.5	57.5	844.4	476.7	221.6	349.5	57.9	157.5	57.9	131.8	57.5	529.6	586	316.1	397.5	396	397.5	1580.6	844.4	2-IgSF FREP	FREPJ2-like	BGLB004530
Bg5224	113.9	60.7	122.4	50.9	84.4	61.9	252.5	113.9	332.8	122.4	156.4	122.4	94.6	84.4	86	60.7	55.5	50.9	46.1	50.9	130.5	61.9	2-IgSF FREP	FREPJ5	BGLB005224
Bg6034	104	77.8	31.6	71.5	29.8	103.7	259.6	104	395	31.6	92.9	31.6	59.6	29.8	85.7	77.8	54.9	71.5	101.1	71.5	183.7	103.7	partial 2-IgSF FREP	FREP12.1-as2-like	BGLB006034
Bg14428	223.7	286.2	383.7	145.7	128.5	283.5	469.3	223.7	626.9	383.7	363.4	383.7	178.7	128.5	184.9	286.2	182.4	145.7	203.3	145.7	457.1	283.5	1-IgSF FREP	FREP14	BGLB014428
Bg16934	0	0.3	0.3	0	0.4	33.9	0	0	0	0.3	0.1	0.3	0.8	0.4	0	0.3	0	0	0	0	0	33.9	2-IgSF FREP	20_tig_3569_BGLB009245b	BGLB016934
Bg16935	176.1	84.9	90.8	70	72.8	88	222.5	176.1	183	90.8	118	90.8	126.2	72.8	58.1	84.9	55.9	70	90.5	70	99.4	88	2-IgSF FREP	19_tig_3569_BGLB009245a	BGLB016935
Bg17688	41.2	46.1	18.6	42.4	14.6	102.3	70	41.2	37.4	18.6	32.4	18.6	33.9	14.6	57.2	46.1	54.5	42.4	81.1	42.4	130.2	102.3	2-IgSF FREP	zb_tig_15796	BGLB017688
Bg20516*	137.5	0	3.6	0.3	4.5	0	914.8	137.5	429.5	3.6	94.6	3.6	16.4	4.5	0.2	0	0	0.3	0	0.3	0	0	partial 2-IgSF FREP	new partial FREP	BGLB020516
Bg22646	134.8	105.6	84.4	102.4	65.7	127.9	192.6	134.8	179.9	84.4	102	84.4	77.2	65.7	91.9	105.6	86.1	102.4	117.9	102.4	111.1	127.9	partial 1-IgSF FREP	new partial FREP	BGLB022646
Bg23857	144.1	323.3	53.7	267.3	70.9	418.4	384.3	144.1	287	53.7	108.8	53.7	125.7	70.9	329.7	323.3	289.4	267.3	329.6	267.3	480.8	418.4	partial 1-IgSF FREP	new partial FREP	BGLB023857
Bg25144*	378.4	119.2	129.6	89	168.4	226.2	662.6	378.4	350	129.6	222.9	129.6	302.2	168.4	117.3	119.2	94	89	189.6	89	303.6	226.2	partial 2-IgSF FREP	new partial FREP	BGLB025144
Bg25334	102.9	4.6	119.5	5.5	58.1	7.4	199.1	102.9	314.8	119.5	146.2	119.5	93	58.1	16.7	4.6	8.7	5.5	5.3	5.5	9.3	7.4	partial 1-IgSF FREP	FREPJ5	BGLB025334
Bg28617	1291.2	530.7	231.9	83	277	80.4	6425.6	1291.2	3488	231.9	756	231.9	564.4	277	176.9	530.7	88.2	83	136.5	83	455.2	80.4	1-IgSF FREP	FREP2	BGLB028617
Bg29167	53.7	76.6	28.5	60.9	31.6	160.6	51	53.7	47.9	28.5	42.8	28.5	52.3	31.6	52.1	76.6	37.2	60.9	93.5	60.9	91.9	160.6	partial 1-IgSF FREP	new partial FREP	BGLB029167
Bg32905*	440.9	3.8	163.4	2.9	471.5	609.1	934.8	440.9	426.2	163.4	328.7	163.4	906.9	471.5	6.9	3.8	4.4	2.9	21.3	2.9	233.9	609.1	partial 2-IgSF FREP	FREPJ1	BGLB032905
Bg38205	9.1	37	1.9	25.8	7.3	100.1	22.9	9.1	13.1	1.9	10.6	1.9	17.2	7.3	26.3	37	17.7	25.8	57	25.8	74.7	100.1	partial 1-IgSF FREP	new partial FREP	BGLB038205
Bg177	2.2	0	3.5	0.8	17.6	0.8	2.7	2.2	7.5	3.5	7.2	3.5	5	17.6	0.7	0	1.3	0.8	1	0.8	0	0.8	sFReD		BGLB000177
Bg178	1.7	0	1.9	0.5	12	1.5	2.9	1.7	6.2	1.9	3.7	1.9	2.4	12	0.4	0	1.2	0.5	0	0.5	0	1.5	sFReD		BGLB000178
Bg2450	1.4	1.7	6	0.4	1.4	8.8	2	1.4	3.4	6	3.7	6	1.5	1.4	1.7	1.7	1.3	0.4	2.7	0.4	4.8	8.8	sFReD		BGLB002450
Bg2494	0	0.1	2.1	0	0.8	36.5	0	0	1.6	2.1	1.3	2.1	1.8	0.8	0	0.1	0.6	0	1.7	0	0.3	36.5	sFReD		BGLB002494
Bg12039	1.8	30.7	3.6	41.4	5.8	50.1	5.6	1.8	5.1	3.6	4.5	3.6	8.2	5.8	18.6	30.7	16.5	41.4	15.9	41.4	18.2	50.1	partial sFReD		BGLB012039
Bg16307	0.6	0	16.6	0.5	8.8	183.9	1	0.6	18.9	16.6	5.5	16.6	10.7	8.8	0.4	0	1.4	0.5	15.1	0.5	0.8	183.9	sFReD		BGLB016307
Bg16436	49.1	58.1	128.1	53.7	32.7	64.2	54.3	49.1	107.7	128.1	75.2	128.1	37.2	32.7	57.7	58.1	60.3	53.7	52	53.7	76.9	64.2	partial sFReD		BGLB016436
Bg17605	42.2	40.9	23	39.5	12	40.7	41.5	42.2	35.9	23	55.4	23	26.3	12	36.6	40.9	27.6	39.5	72	39.5	37.6	40.7	sFReD		BGLB017605
Bg18336	17.1	10.4	8.1	8.1	14.2	20.6	38.5	17.1	21.9	8.1	12.6	8.1	16.6	14.2	9.8	10.4	6.4	8.1	9.1	8.1	18	20.6	sFReD	za_tig_4714	BGLB018336
Bg20351	5.6	31	0.5	1.5	0.4	4.6	66.8	5.6	81.9	0.5	6	0.5	2.7	0.4	2.9	31	1.3	1.5	0.2	1.5	4.9	4.6	sFReD	BgMFREP4_AY012701-like	BGLB020351
Bg25643	51.2	44.5	73.9	30.7	56.6	41	162.8	51.2	80.4	73.9	69.7	73.9	51	56.6	59	44.5	42.4	30.7	55.7	30.7	64.1	41	sFReD		BGLB025643
Bg28385	78	1.1	215.6	3.3	641.5	321.6	467.2	78	187.3	215.6	282.8	215.6	495.4	641.5	14	1.1	51.2	3.3	35.9	3.3	58.4	321.6	sFReD		BGLB028385
Bg34525	5.1	3.7	7.3	7.1	9.4	12.6	16.5	5.1	11.3	7.3	7.4	7.3	13.2	9.4	3.8	3.7	5.5	7.1	6.1	7.1	8.2	12.6	partial sFReD		BGLB034525
Bg37621	8.7	7.9	13.5	8.5	37.4	17.7	64.5	8.7	22.6	13.5	19.7	13.5	39.8	37.4	14.4	7.9	9.1	8.5	20.4	8.5	18.7	17.7	partial sFReD		BGLB037621
Bg38723	0.6	0	0.8	0	3.7	19.3	0.3	0.6	2.7	0.8	4.7	0.8	9.6	3.7	0	0	0	0	0.7	0	0	19.3	sFReD		BGLB038723
Bg40034	173.6	7.1	106	7.1	113.5	27.3	206.3	173.6	228.1	106	157.6	106	163.9	113.5	7.7	7.1	5.3	7.1	16.2	7.1	29.3	27.3	partial sFReD	16_tig_2402_BGLB007591-like	BGLB040034
Bg40437	1.7	0	15	0	3.6	64.4	2.6	1.7	7.1	15	2.8	15	5.3	3.6	0.8	0	0.2	0	8.8	0	1.4	64.4	partial FReM	FReM	BGLB040437
Bg21	88.9	62.2	54.1	48	51.8	97.6	127.1	88.9	109.2	54.1	66.1	54.1	76	51.8	52.4	62.2	43.5	48	64	48	130.3	97.6	2-IgSF FREP	17_tig_2702_BGLB000021	BGLB000021
Bg100	86.1	95.2	38.6	71.1	42.2	344	70.8	86.1	64.8	38.6	59.6	38.6	90.4	42.2	62	95.2	49.2	71.1	104	71.1	105.6	344	2-IgSF FREP	14_tig_2094_BGLB000100	BGLB000100
Bg140	528.4	178.1	153.1	119.8	192.7	326.8	490.2	528.4	319.3	153.1	312.4	153.1	456.5	192.7	168.3	178.1	105.2	119.8	184.4	119.8	379.7	326.8	2-IgSF FREP	FREP13.1	BGLB000140
Bg179	0.3	0	0.2	0.4	0.8	1	0	0.3	0	0.2	0	0.2	19.6	0.8	0.3	0	0.6	0.4	0	0.4	11.2	1	1-IgSF FREP	FREP1	BGLB000179
Bg5196	19.8	20.6	17.6	18.9	19.4	27.5	11.7	19.8	15.5	17.6	24.4	17.6	46.6	19.4	14.2	20.6	19.5	18.9	19.1	18.9	15	27.5	partial sFReD		BGLB005196
Bg7076	210.8	218.2	114.6	186.3	85.3	272	259.8	210.8	235.9	114.6	142.5	114.6	139.9	85.3	192.3	218.2	168.5	186.3	220.9	186.3	281.3	272	2-IgSF FREP	4_tig_565_BGLB000073-like	BGLB007076
Bg7576	1.5	1.9	0.3	2.8	1.3	3.5	2	1.5	1.9	0.3	1.4	0.3	0.9	1.3	0.9	1.9	2	2.8	2.7	2.8	4.4	3.5	2-IgSF FREP	FREPM	BGLB007576
Bg10948	196	79.9	83.1	67.9	196.3	550.9	327.8	196	107.8	83.1	135.7	83.1	362.5	196.3	78.3	79.9	47.8	67.9	101.3	67.9	208.9	550.9	partial 2-IgSF FREP	FREPK1	BGLB010948
Bg11626	240.2	240	167.3	180.1	97.8	295	272.7	240.2	265.4	167.3	168.7	167.3	180.7	97.8	207.8	240	159	180.1	207.7	180.1	328.6	295	2-IgSF FREP	FREP12-like	BGLB011626
Bg11627	275.9	253.7	157.1	204.3	152.1	247.7	333.9	275.9	294	157.1	193.4	157.1	208.7	152.1	258.1	253.7	178.6	204.3	284	204.3	317.5	247.7	2-IgSF FREP	5_tig_565_BGLB011626	BGLB011627
Bg12226	0.5	0.3	0.5	0	2.1	7.9	1	0.5	1.6	0.5	1.7	0.5	4.9	2.1	0.3	0.3	0.2	0	0.8	0	2.6	7.9	partial sFReD		BGLB012226
Bg12382	13.5	10.6	15.2	8.2	3.4	5.5	13	13.5	13.4	15.2	10.3	15.2	6	3.4	14	10.6	12	8.2	7.9	8.2	13.6	5.5	partial sFReD		BGLB012382
Bg17041	1.4	0	3.2	0	1.3	2.7	2.6	1.4	5	3.2	3.3	3.2	3.2	1.3	0	0	0.3	0	1	0	1.4	2.7	sFReD		BGLB017041
Bg17893	10	14.6	6.3	10.6	4.6	15.7	16.3	10	7.3	6.3	4.9	6.3	12.2	4.6	12	14.6	10.4	10.6	16.7	10.6	28.9	15.7	2-IgSF FREP	6_tig_990_BGLB014388	BGLB017893
Bg21912	0	0	0.4	0.3	0.2	0	0.3	0	0.4	0.4	0	0.4	0	0.2	0	0	0	0.3	0	0.3	0	0	sFReD		BGLB021912
Bg22867	0.8	1	0.3	2.2	3.6	3.2	0.3	0.8	0.4	0.3	1.7	0.3	12.1	3.6	0.4	1	0.9	2.2	1.3	2.2	1.5	3.2	partial sFReD		BGLB022867
Bg25627	1.2	0	2.4	0	0.8	2.3	1.3	1.2	2.7	2.4	2.7	2.4	2.4	0.8	0	0	0	0	0.3	0	0	2.3	partial sFReD		BGLB025627
Bg29288	3.4	3	2	1.7	2.4	1.5	6.3	3.4	2.3	2	3.1	2	1.7	2.4	2.7	3	1.3	1.7	3.1	1.7	3.9	1.5	partial sFReD		BGLB029288
Bg30478	1.7	0.7	1.7	0.6	0.4	0.6	3.5	1.7	1.2	1.7	0.2	1.7	0.4	0.4	1.2	0.7	0.3	0.6	0.3	0.6	0.4	0.6	partial sFReD		BGLB030478
Bg30830	0	0.3	2.9	0.7	0.4	3	1	0	1.9	2.9	1.7	2.9	0.5	0.4	0	0.3	1.1	0.7	2	0.7	2.7	3	partial sFReD		BGLB030830
Bg31381	53.8	56.6	41.6	33.4	226.4	48.7	70.9	53.8	40.6	41.6	40.7	41.6	226.6	226.4	22.3	56.6	70.8	33.4	30.8	33.4	30.9	48.7	sFReD		BGLB031381
Bg31596	333.5	448.4	919	406.4	226.8	457	517.1	333.5	789	919	625.4	919	311.5	226.8	501.3	448.4	469.1	406.4	437.8	406.4	634.4	457	partial sFReD		BGLB031596
Bg36251	1.8	1.5	0.4	2.3	0.4	7.2	0.9	1.8	2.6	0.4	2.2	0.4	0.4	0.4	3.5	1.5	2.2	2.3	1.4	2.3	1.5	7.2	sFReD		BGLB036251
Bg38117	0.3	0.6	4.9	1	1.6	7.6	2	0.3	2.9	4.9	5	4.9	0	1.6	0.7	0.6	1.9	1	1.8	1	5.4	7.6	partial sFReD		BGLB038117
Bg38186	0	0	1.4	0	1.5	0.6	0	0	2.4	1.4	3.6	1.4	1.6	1.5	0.2	0	0.2	0	0.3	0	1	0.6	sFReD		BGLB038186
Bg39918	3.4	2.1	2.2	1.3	5.1	3.2	2.2	3.4	1.6	2.2	4.4	2.2	4.8	5.1	2.3	2.1	1.6	1.3	1.8	1.3	0.6	3.2	sFReD		BGLB039918
Bg40226*	380.5	165.4	170	99.8	290.5	553.1	531.8	380.5	256.7	170	291.3	170	428.4	290.5	143.5	165.4	103.9	99.8	262.3	99.8	491.1	553.1	partial 2-IgSF FREP	FREPJ3-like	BGLB040226
Bg40228	180.4	96	70.9	60.6	113.2	202	283.6	180.4	145.8	70.9	124.3	70.9	211.3	113.2	83.6	96	66.5	60.6	138.4	60.6	272.3	202	1-IgSF FREP	new FREP	BGLB040228
Bg40339	521.7	351.1	485.3	410.9	363.6	574.4	267.9	521.7	531	485.3	581.5	485.3	670.4	363.6	394.6	351.1	484.9	410.9	541.2	410.9	713	574.4	sFReD		BGLB040339
Notes:
1. Values in cells represent the average normalized read counts for each group at different sampling time points.
2. “0.5dpe, 2dpe, 8dpe, 40dpe” represent the 4 sampling time points. They include time-matched unexposed controls and exposed snails for valid comparisons.
3. In the column of “Type of FReD”, B. glabrata FReD proteins were considered “partial” based on the criteria set in this study. “1-IgSF FREP” and “2-IgSF FREP” represent numbers of IgSF domains in a particular FREP.
4. In the column of “ID used in text”, IDs highlighted in gray represent the differentially expressed (DE) FReD genes in any comparison applied.
5. In the column of “Best hit to published FREP”, the best hit of the protein against published B. glabrata FREP sequences from available sources [30,32–34] were listed. Any protein sequence identity ≥90% is considered as the same FREP; identity 85~90% is considered as the corresponding FREP “-like”; identity <85% is not assigned to any published FREP. Several FREPs were highlighted in yellow to …
6. In the differential expression analysis, SUS unexposed snails were set as baseline for the corresponding time-matched RES unexposed snails at constitutive level; RES unexposed snails were used as baseline for the corresponding time-matched RES snails exposed to S. mansoni; similarly, SUS unexposed snails were used as baseline for the corresponding time-matched SUS snails exposed to S. mansoni.
